# Supplementary material for: Kinetics and impacting factors of HO 2 uptake onto submicron atmospheric aerosols during the 2019 Air QUAlity Study (AQUAS) in Yokohama, Japan
Source: Copernicus journal article supplement (doi:10.5194/acp-21-12243-2021), 2021-08-16
Supplement: Supplementary file 1 [file acp-21-12243-2021-supplement.pdf]

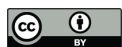

*Supplement of*

**Kinetics and impacting factors of HO<sub>2</sub> uptake onto submicron atmospheric aerosols during the 2019 Air QUALity Study (AQUAS) in Yokohama, Japan**

**Jun Zhou et al.**

*Correspondence to:* Jun Zhou (junzhou@jnu.edu.cn) and Yoshizumi Kajii (kajii.yoshizumi.7e@kyoto-u.ac.jp)

The copyright of individual parts of the supplement might differ from the article licence.

24

25 The Supporting Information includes the following contents and Figures.

26

## 27 **Contents**

28 Air mass directions iv

29 Measurement strategy vii

30 A technique combined laser-flash photolysis with laser-induced fluorescence (LFP–LIF) viii

31 The enrichment of the ambient aerosols ix

32 HO<sub>2</sub> reactivity of ambient air x

33 Correction of gas-phase diffusion for HO<sub>2</sub> uptake coefficient xii

34 HO<sub>2</sub> reactivity of ambient gas phase ( $k_g$ ) xiii

35 Temperature and pressure influence correction xiv

36 Profiles of key factors used in Section 3.5: xix

37 References xxii

38

## 39 **Figures**

40

41 Figure S1: NOAA-HYSPLIT model showing back trajectories for ~ 11 days sample periods from 12:00  
42 July 24 to 00:00 August 04, 2019 (back trajectories ending 00:00 UTC 25 July to 00:00 August 04,  
43 2019) from the sampling site. Arriving air masses 250 m, 500 m, and 1000 m above ground level (AGL)  
44 were calculated using the following website: [http://ready.arl.noaa.gov/hypub-](http://ready.arl.noaa.gov/hypub-bin/trajtype.pl?runtype=archive)  
45 [bin/trajtype.pl?runtype=archive](http://ready.arl.noaa.gov/hypub-bin/trajtype.pl?runtype=archive) ..... vi

46

47 Figure S2: (a) Sampling setup for testing HO<sub>2</sub> reactivity using laser-flash photolysis and laser-induced  
48 fluorescence (LFP–LIF) with a versatile aerosol concentration enrichment system (VACES) and auto-  
49 switching aerosol filter (SMPS = scanning mobility particle sizer; AMS = aerosol mass spectrometer;  
50 CAPS=cavity attenuated phase shift). (b) Detailed presentation of the measurement process of the HO<sub>2</sub>  
51 reactivity of the ambient aerosol phase. Further details concerning the measurement process can be  
52 found in our previous publication<sup>3</sup> .....viii

53

|    |                                                                                                                                          |       |
|----|------------------------------------------------------------------------------------------------------------------------------------------|-------|
| 54 | Figure S3: Examples of the measured HO <sub>2</sub> decay profiles in zero air (black lines), ambient air without                        |       |
| 55 | aerosol phase (green lines), and ambient air with enriched aerosol phase (red lines) at an RH of ~60%,                                   |       |
| 56 | 301 K, and an initial HO <sub>2</sub> concentration of ~10 <sup>10</sup> molecules cm <sup>-3</sup> . The log scale plot in the inserted |       |
| 57 | figure at the upper right shows linear fitting in the range 0.08–0.4.....                                                                | xii   |
| 58 |                                                                                                                                          |       |
| 59 | Figure S4: Average of HO <sub>2</sub> reactivity calibrations using LFP–LIF with different NO <sub>2</sub> concentrations                |       |
| 60 | supplied by NO <sub>2</sub> gas. The green lines represent the ±68.3% prediction band of the calibration data points                     |       |
| 61 | (1σ = 0.1 s <sup>-1</sup> ), i.e., the uncertainty in the estimation of HO <sub>2</sub> reactivity using the calibration                 |       |
| 62 | curve. ....                                                                                                                              | xiii  |
| 63 | Figure S5: Diurnal trends in non-refractory chemical components plus eBC of group i (left side) and                                      |       |
| 64 | group ii (right side).....                                                                                                               | xv    |
| 65 | Figure S6: Diurnal trends in total HO <sub>2</sub> reactivity caused by the ambient aerosol phase ( <i>k<sub>a</sub></i> , upper panel)  |       |
| 66 | and the HO <sub>2</sub> uptake coefficients onto ambient aerosols ( <i>γ</i> , lower panel).....                                         | xv    |
| 67 | Figure S7: Correlations between measured and modeled <i>γ</i> with (a) <i>γ</i> < 0.4 and (b) <i>γ</i> ≥ 0.4.....                        | xvi   |
| 68 | Figure S8: Time series of the half an hour averaged ambient RH (red open cycles in the upper panel)                                      |       |
| 69 | and temperature (red filled cycles in the lower panel) measurements in comparison to the reaction cell                                   |       |
| 70 | RH (black open cycles in the upper panel) and temperature (black filled cycles in the lower panel)...                                    | xvi   |
| 71 | Figure S9: <i>k<sub>a</sub></i> and <i>γ</i> values as a function of RH in the reaction cell, colored coded with <i>T</i> .....          | xvii  |
| 72 | Figure S10: <i>k<sub>a</sub></i> (upper panel) and <i>γ</i> (lower panel) as a function of mean particle diameter, color coded           |       |
| 73 | with the surface area concentration. ....                                                                                                | xvii  |
| 74 | Figure S11: Dependence of day time LN/Q and LN/Q_without_aerosol on [NO].....                                                            | xix   |
| 75 | Figure S12: Temporal variations in key factors in ambient air for determining XO <sub>2</sub> loss rates and P(O <sub>3</sub> )          |       |
| 76 | sensitivity in Sect. 3.6. ....                                                                                                           | xix   |
| 77 | <b>Tables</b>                                                                                                                            |       |
| 78 | Table S1: Summary of equations and values used in section 3.4.....                                                                       | xviii |
| 79 | Table S2: Summary of equations and values used in section 3.6.. ....                                                                     | xvii  |
| 80 |                                                                                                                                          |       |
| 81 |                                                                                                                                          |       |
| 82 |                                                                                                                                          |       |
| 83 |                                                                                                                                          |       |
| 84 |                                                                                                                                          |       |
| 85 |                                                                                                                                          |       |
| 86 |                                                                                                                                          |       |
| 87 |                                                                                                                                          |       |

## Air mass directions

Figure S1a shows air mass direction schematic diagram during the campaign. For each day, the Internet-Based HYSPLIT Trajectory Model and gridded meteorological data (Global Data Assimilation System, GDAS1) from the U.S. National Oceanic and Atmospheric Administration (NOAA) were used during the modeling, the tested results of all experimental days are listed in Fig. S1b. Backward trajectories ended at local time 00:00 am and 12:00 pm after a total run time of 12 h. Results suggesting that arriving air mass can be classified into two categories (i) from the sea to the north direction towards Yokohama City (~19% of the experimental period: from 12:00 pm Jul. 25 to 12:00 Jul. 27, 2019); (ii) from the mainland towards Yokohama City (~81% of the experimental period).

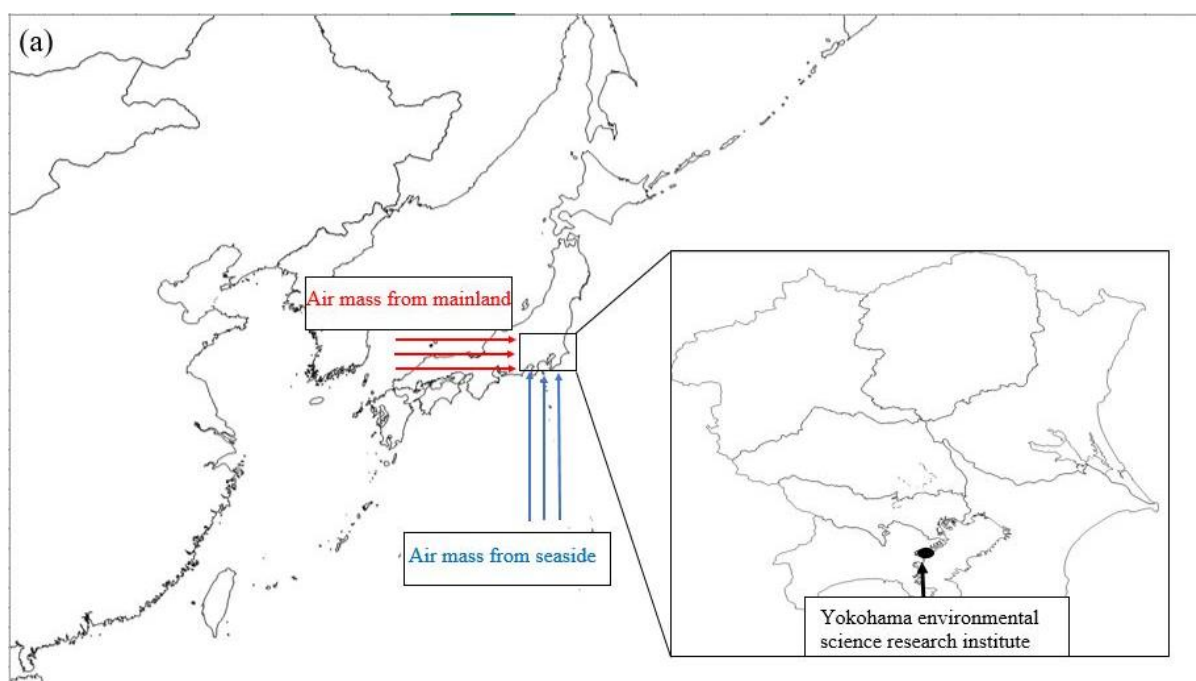

106 (b)

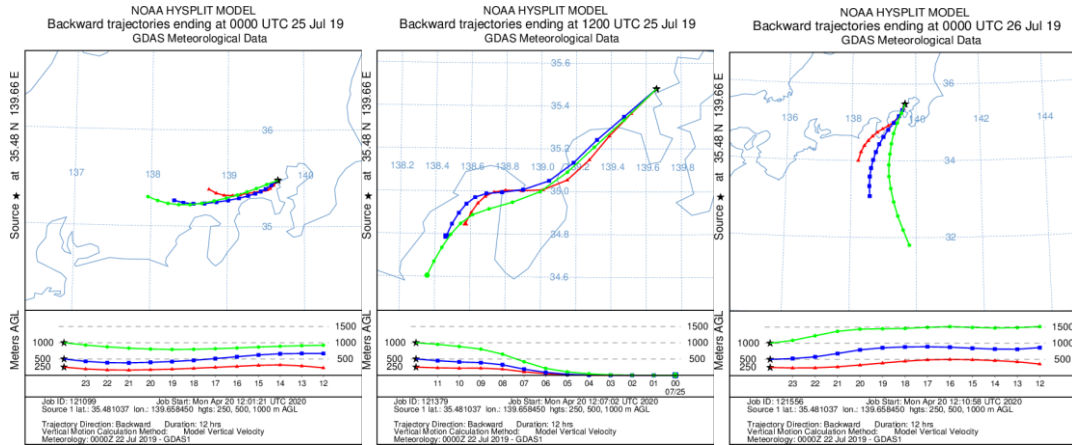

107

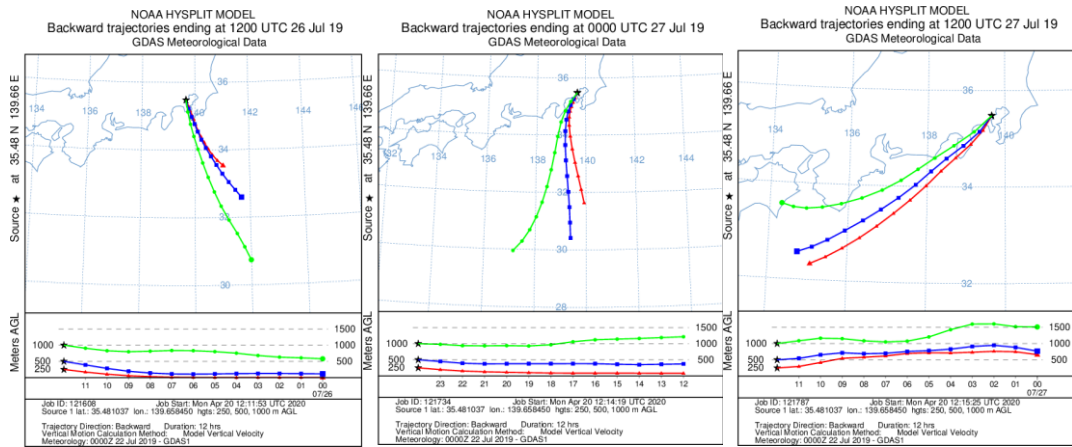

108

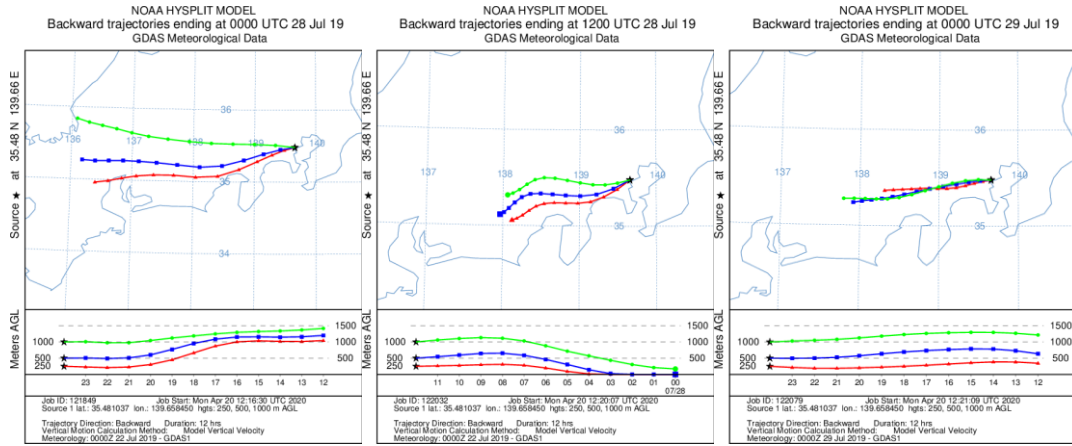

109

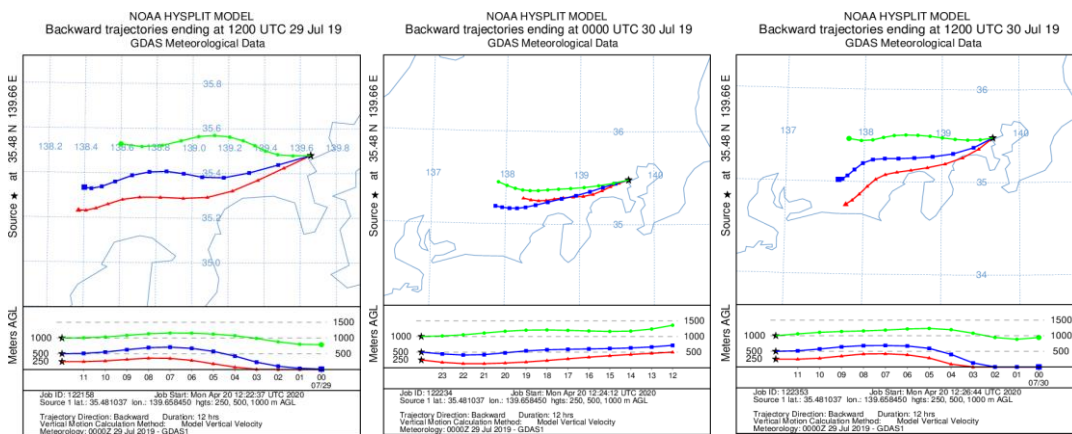

115

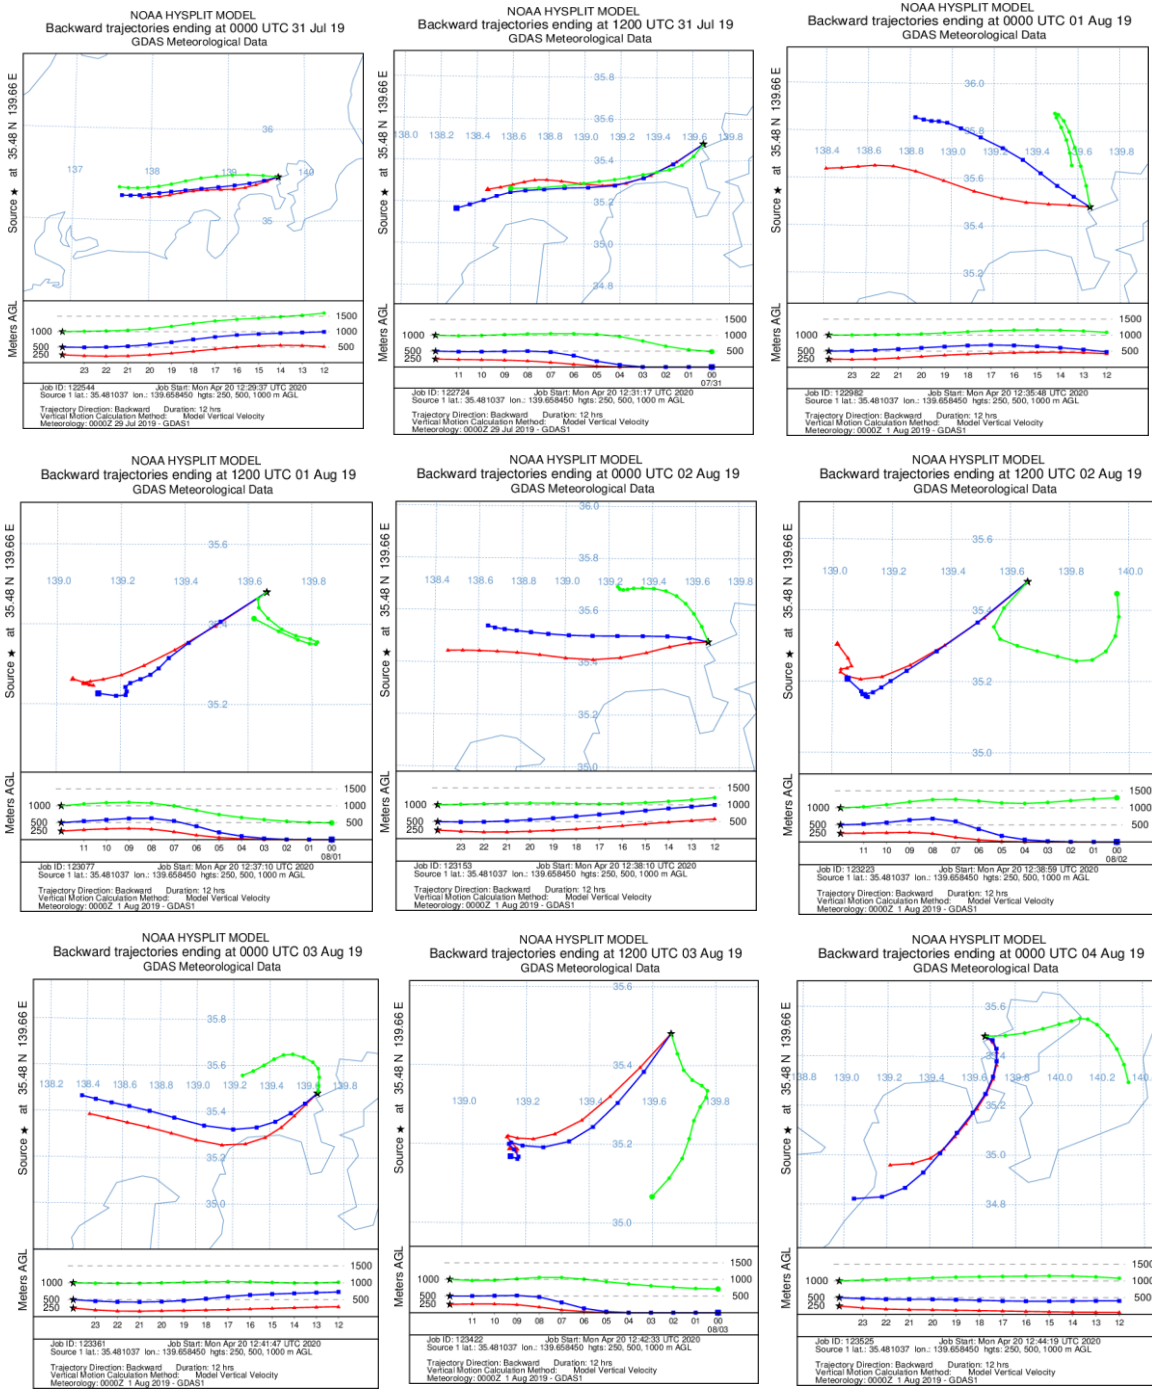

Figure S1: (a) Air mass direction schematic diagram; (b) NOAA-HYSPLIT model showing back trajectories for ~ 11 days sample periods from 12:00 July 24 to 00:00 August 04, 2019 (back trajectories ending 00:00 UTC 25 July to 00:00 August 04, 2019) from the sampling site. Arriving air masses 250 m, 500 m, and 1000 m above ground level (AGL) were calculated using the following website: <http://ready.arl.noaa.gov/hypub-bin/trajtype.pl?runtype=archive>

## Measurement strategy

The HO<sub>2</sub> reactivity was measured using LFP–LIF, adapted from a laser-induced pump and probe OH reactivity measurement technique, which has been validated and employed for the total gas phase HO<sub>x</sub> (=OH+HO<sub>2</sub>) reactivity and HO<sub>x</sub> uptake kinetics onto ambient aerosols in field<sup>1, 2-4</sup>. We further coupled this system with a versatile aerosol concentration enrichment system (VACES) to enrich the ambient aerosols to compensate the relatively low limit of detection (LOD) for the HO<sub>2</sub> reactivity measurement. A schematic of the experimental system is shown in Fig. S2a, and a detailed abstract of the measurement process of the HO<sub>2</sub> reactivity of the ambient aerosol phase is shown in Fig. S2b. The ambient air was drawn into the VACES, where the aerosol concentration was enriched. The ambient air was then sampled using a three-port valve (Bolt, Flon Industry Co., LTD) and injected into the LFP–LIF system at a flow rate of 8 L min<sup>-1</sup>. The valve was switched automatically between two sampling lines, one with the aerosol filter and the other without the aerosol filter (termed “the auto-switching aerosol filter” hereafter), which enabled alternative measurements of HO<sub>2</sub> reactivity by the gas phase and the gas + enriched aerosol phase of the ambient air, separately.

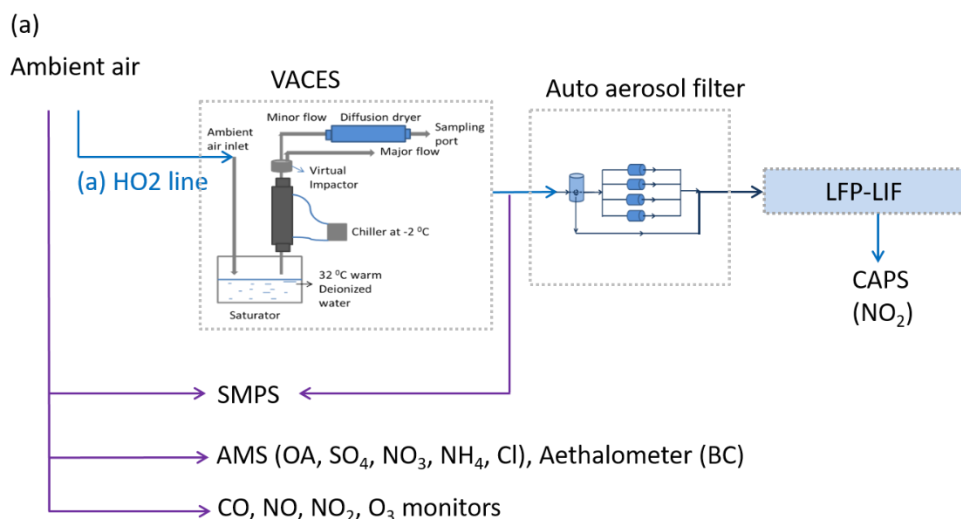

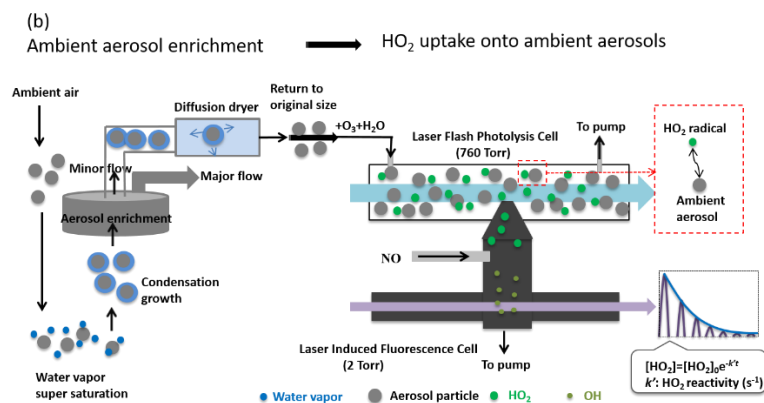

Figure S2: (a) Sampling setup for testing  $\text{HO}_2$  reactivity using laser-flash photolysis and laser-induced fluorescence (LFP–LIF) with a versatile aerosol concentration enrichment system (VACES) and auto-switching aerosol filter (SMPS = scanning mobility particle sizer; AMS = aerosol mass spectrometer; CAPS = cavity attenuated phase shift); and (b) Detailed presentation of the measurement process of the  $\text{HO}_2$  reactivity of the ambient aerosol phase. Further details concerning the measurement process can be found in our previous publication<sup>3</sup>.

### A technique combined laser-flash photolysis with laser-induced fluorescence (LFP–LIF)

LFP–LIF comprises two cells: the laser-flash photolysis cell (the reaction cell) and the laser-induced fluorescence detection cell (the detection cell). In the  $\text{HO}_2$  reaction cell, pure air was supplied by a zero-air generator (Model 111, Thermo Fisher Scientific Inc., USA), and relative humidity was controlled by bubbling water vapor into one part of the zero air. The ambient air was sampled into the reaction cell after mixed with the humidified zero air and  $\text{O}_3$ , where  $\text{O}_3$  (~100 ppb) was generated by 184.9 nm irradiation of zero air by a low-pressure Hg lamp (pen ray lamp, Sen lights corporation, JP, part number: SP-5-2H (5w)) at 50 sccm (standard cubic centimeter per minute, at 273 K and 1 atm). The reaction cell was made of aluminum, with a length of 1.4 m and an inner diameter of 0.04 m, and the inner wall of the flow tube was coated with Teflon to reduce the heterogeneous losses of  $\text{HO}_2$  and the reactants. The sample inlet of the detection cell was located ~0.7 m from the sample injection position. The total flow inside the reaction cell was ~10 L min<sup>-1</sup>, with a residence time of ~4.8 s. The Reynolds number in the reaction cell was ~354 and (1 atm pressure and 298 K were assumed inside the reaction cell), thus indicating a laminar flow. A pulsed 266-nm Nd:YAG laser (Tempest 300, New Wave Research Inc., USA), with a 1-cm diameter, laser power ranging between 0.4 and 3.0 mJ pulse<sup>-1</sup>, and a repetition of 1 Hz, was used in the reaction cell to irradiate the sample air to produce OH through reactions SR1–SR2.



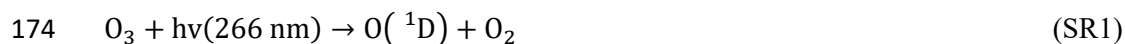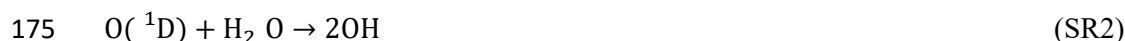

176 Meanwhile, excess CO was introduced into the reaction cell to convert all OH radicals to HO<sub>2</sub>:

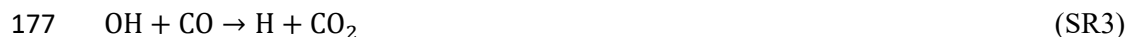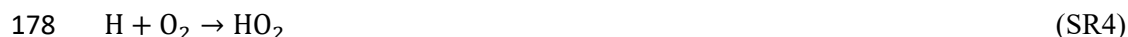

179 The initial HO<sub>2</sub> concentration in the reaction cell was of the order of 10<sup>10</sup> molecules cm<sup>-3</sup>, estimated  
 180 from the photolysis power, humidity, and O<sub>3</sub> concentration<sup>3</sup>. A stream of flow (~ 2 LPM) in the reaction  
 181 cell was pumped into the detection cell using a rotary oil pump (D-950, ULVAC) under a pressure of  
 182 1.6 Torr through a 0.5-mm pinhole. NO (>99.999%) was injected with a flow rate of 3 sccm between  
 183 the reaction cell and the detection cell to convert HO<sub>2</sub> to OH (Eq. SR5, conversion efficiency: ~ 30%).  
 184 The second harmonic of a pulsed laser (Sirah Credo, Spectra Physics) pumped by the second harmonic  
 185 of a Nd:YVO<sub>4</sub> laser (YHP40-532Q, Spectra Physics) and set at a maximum absorption of Q<sub>1</sub>(2) A<sup>2</sup>Σ<sup>+</sup>(v'  
 186 = 0) ← X<sup>2</sup>Π<sub>3/2</sub>(v'' = 0) transition of OH at 308 nm was used to irradiate the detection cell with a  
 187 repetition rate of 10 kHz. The fluorescence emitted by the OH radical induced by each irradiation was  
 188 collected by a photomultiplier tube (R2256P, Hamamatsu Photonics), and a decay file of OH was  
 189 obtained after 240 integrations. The HO<sub>2</sub> decay rate was considered the same as the OH decay rate as  
 190 we were measuring the relative change in the HO<sub>2</sub> concentration in the detection cell.

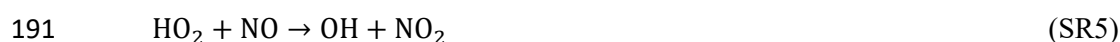

## 192 **The enrichment of the ambient aerosols**

193 The versatile aerosol concentration enrichment system (VACES) was built according to Sioutas  
 194 et al. (1999)<sup>5</sup>, which comprises the aerosol growth part and the aerosol enrichment part (as shown in  
 195 Fig. S2a). The ambient air sample was drawn into VACES at a flow rate of over 100 L min<sup>-1</sup> (Q<sub>tot</sub>) into  
 196 a ultra-pure water tank which was heated to ~32°C, where the ambient air steam was saturated and then  
 197 cooled down in a condenser connected immediately above the tank (with a temperature of -2 °C). The  
 198 grew ambient aerosol (mostly with a diameter > 2 μm) through condensed water droplets were then

enriched by a virtual impactor with a 50% cutoff point less than 1  $\mu\text{m}$ , with  $\sim 92 \text{ L min}^{-1}$  going to the major flow that connected to the exhaust pump and  $\sim 8 \text{ L min}^{-1}$  going to the minor flow ( $q_{\text{min}}$ ) that connected to the aerosol instrumentations after passing through a diffusion dryer. In theory, the enrichment factor (EF) of the ambient aerosol concentration can be estimated as:

$$\text{EF} = Q_{\text{tot}}/q_{\text{min}}(1 - \text{WL}) \times \eta_{\text{vi}} \quad (\text{S1})$$

where  $\eta_{\text{vi}}$  and WL are its collection efficiency and fractional loss, respectively<sup>5</sup>. The enrichment efficiency (EE) of the impactor was estimated as  $\sim 1^3$ . In this study, we test the enrichment factor of the surface area of the enriched ambient aerosols ( $E$ ) by connecting two SMPS before and after VACES separately for  $\sim 2$  hours every day for  $\sim 6$  days, the enrichment factor can be calculated as:

$$E = S_1/S_2 \quad (\text{S2})$$

Where  $S_1$  and  $S_2$  are the surface areas of the enriched ambient aerosols after VACES and the ambient aerosols before VACES, respectively. Obtained  $E$  values from all the tests were then averaged and used as the final enrichment factor ( $\sim 12.5 \pm 2.5$ ) for all the experimental days. The surface area of the enriched ambient aerosols with diameters  $< 2.5 \mu\text{m}$  ( $ES$ ) are propagated from  $S_1$  multiply the ratio between mass concentration of  $\text{PM}_{2.5}$  and  $\text{PM}_{0.74}$  (calculated as  $\sim 1.1$ ), by assuming the total volume and the total surface area of each size distribution bin (ranged from 0 to  $2.5 \mu\text{m}$ ) of  $\text{PM}_{2.5}$  are increased in proportional with mass concentration compared to that of  $\text{PM}_{0.75}$  (ranged from 0 to  $0.75 \mu\text{m}$ ):

$$ES = \frac{\text{PM}_{2.5}}{\text{PM}_{0.74}} \times S_1 \quad (\text{S3})$$

## **HO<sub>2</sub> reactivity of ambient air**

Owing to the excess CO, almost all HO<sub>2</sub> radicals formed in the reaction cell after the photolysis pulse, and the HO<sub>2</sub> and RO<sub>2</sub> radicals in urban ambient air were destroyed, or at least partially, during their intake into the LFP detection cell, thus the self-reaction of HO<sub>2</sub> and the interaction of HO<sub>2</sub> with RO<sub>2</sub> owing to the inherent HO<sub>2</sub>/RO<sub>2</sub> concentrations from ambient air was negligible. Due to the large excess reactants over HO<sub>2</sub> radicals produced in the LFP reaction cell, pseudo-first order conditions were achieved, and the HO<sub>2</sub> decay rate  $k$  (HO<sub>2</sub> reactivity) can be explained through the following equation<sup>2</sup>:

$$\frac{d[\text{HO}_2]}{dt} = -(k_{\text{NO}_2}[\text{NO}_2] + k_{\text{NO}}[\text{NO}] + k_{\text{aerosol}}[\text{ambient aerosol}] + k_{\text{wall}}) \times [\text{HO}_2] \quad (\text{S4})$$

where  $k_i$  is the rate constant of the  $\text{HO}_2$  reaction with different reacting species  $i$ , where  $i = \text{NO}_2, \text{NO}$  and the ambient aerosols.  $k_{\text{wall}}$  is the loss rate of the  $\text{HO}_2$  radicals onto the wall, and  $[i]$  represents the concentration of the reacting species  $i$ . Due to the short reaction time,  $k_{\text{wall}}$  was small and included in the baseline. And the consumption of  $\text{HO}_2$  by  $\text{NO}$  in the reaction cell is immediately compensated by excess  $\text{CO}$ , converting its product  $\text{OH}$  back to  $\text{HO}_2$ ; therefore, the  $\text{HO}_2$  decay in the LFP reaction cell may be mostly attributed to its reaction with  $\text{NO}_2$  and aerosol phase. The reaction with  $\text{NO}_2$  will produce peroxyntic acid:

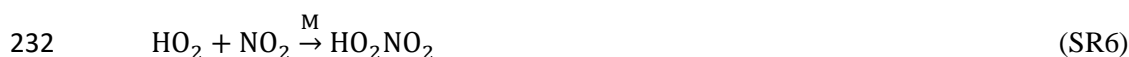

Ideally, the thermal unimolecular decomposition of  $\text{HO}_2\text{NO}_2$  may occur. However, we didn't consider this reverse reaction, due to (1) The reaction cell (~40 mm diameter) is considerably larger than the reaction-initialized region (the laser beam covered area, ~10 mm diameter). The  $\text{HO}_2$ ,  $\text{NO}_2$ , and  $\text{HO}_2\text{NO}_2$  that are produced will diffuse to the outside of the reaction-initialized region (~16 times diluted), thus largely reducing the reactant concentrations. Further, reproducing the reaction process is impossible because the sampling port of the deflection cell is located in the center of the reaction-initialized region; (2) The log scale plot of the  $\text{HO}_2$  decay profile as a function of time was linear in the fitting range (as illustrated in Fig. S3). 3) As shown in Fig. S4, the  $\text{HO}_2$  reactivity exhibited a linear correlation with the wide concentration range of  $\text{NO}_2$ . These phenomena indicate the negligible influence of the reverse reaction to the gas phase  $\text{HO}_2$  reactivity. We also observed the negligible reverse reaction previously, even in the case of lower  $\text{HO}_2$  and  $\text{NO}_2$  concentrations<sup>2</sup>. We assume the heterogeneous loss of  $\text{HO}_2$  by the aerosol following the single first order reaction step as:

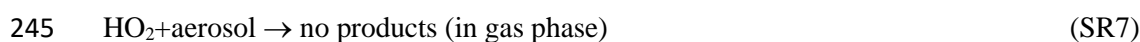

$\text{HO}_2$  was converted to  $\text{OH}$  in the reaction with  $\text{NO}$  in the detection cell, according to Eq. SR5. The  $\text{HO}_2$  concentrations were then measured by laser-induced fluorescence from  $\text{OH}$  after each probe laser (266

248 nm) irradiation to obtain a decay curve. Examples of the time series of HO<sub>2</sub> decay files of zero air,  
 249 ambient air without aerosols and ambient air with enriched aerosols are shown in Fig. S3.

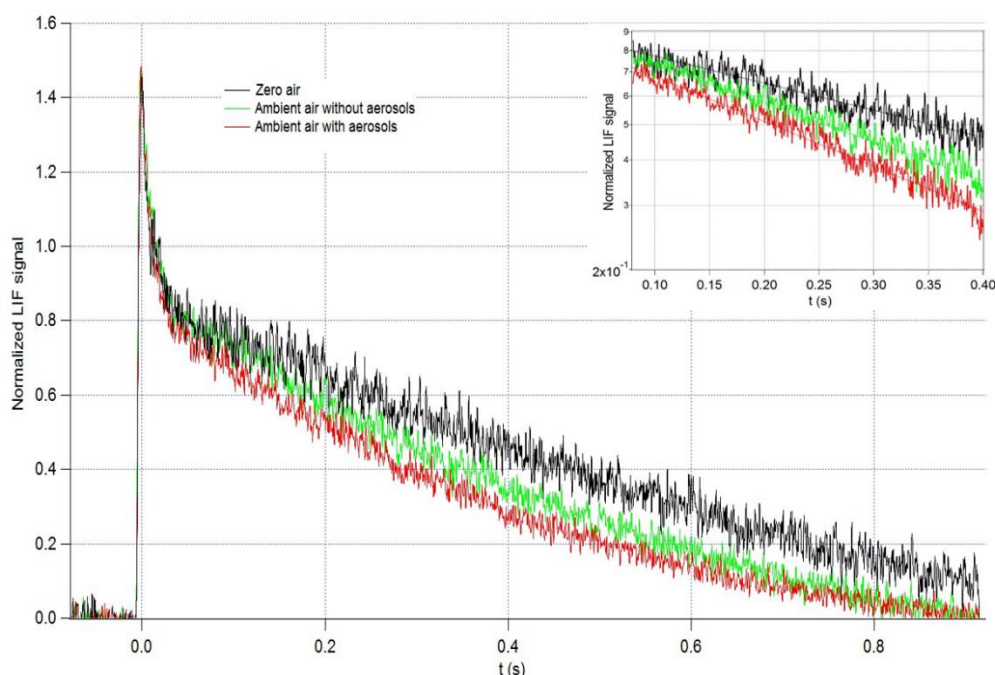

250  
 251 Figure S3: Examples of the measured HO<sub>2</sub> decay profiles in zero air (black lines), ambient air without  
 252 aerosol phase (green lines), and ambient air with enriched aerosol phase (red lines) at an RH of ~60%,  
 253 301 K, and an initial HO<sub>2</sub> concentration of ~10<sup>10</sup> molecules cm<sup>-3</sup>. The log scale plot in the inserted  
 254 figure at the upper right shows linear fitting in the range of 0.08–0.4.

## 255 Correction of gas-phase

### 256 for HO<sub>2</sub> uptake coefficient

257  $\gamma_{obs}$  includes the gas phase diffusion, and as the HO<sub>2</sub> radical is active in aerosol bulk, the resistance  
 258 model was usually utilized for explaining the observed uptake coefficients (George et al., 2013;  
 259 Davidovits et al., 2006):

$$260 \quad \frac{1}{\gamma_{obs}} = \frac{1}{\gamma_{diffusion}} + \frac{1}{\alpha} + \frac{1}{\gamma_{reaction+partitioning}} \quad (S5)$$

261 where  $\gamma_{obs}$  and  $\gamma_{diffusion}$  represent the observed uptake coefficients and the gas transport coefficient,  
 262 respectively,  $\alpha$  is the mass accommodation, and the third term represents the resistance caused by the  
 263 sum of the reactive and partitioning processes within the aerosol. The observed uptake coefficients were  
 264 further corrected to take into account gas diffusion contribution, and the final  $\gamma$  can be obtained from  
 265 Eq. S6<sup>6, 7</sup>:

$$\gamma = \frac{\gamma_{\text{obs}}}{1 - \gamma_{\text{obs}} \lambda(r_s)} \quad (\text{S6})$$

where  $\lambda(r_s)$  are is obtained from Eq. S7:

$$\lambda(r_s) = \frac{0.75 + 0.283 K_n}{K_n(1 + K_n)} \quad (\text{S7})$$

$$\text{where } K_n = \frac{3D_g}{w_{\text{HO}_2} r_s} \quad (\text{S8})$$

where  $D_g$  is the gas phase diffusion coefficient of  $\text{HO}_2$  ( $0.25 \text{ cm}^2 \text{ s}^{-1}$ ) at  $\sim 298 \text{ K}$ , and  $r_s$  represents the average radius of the aerosols, defined as follows:

$$r_s^2 = \frac{A_{\text{total}}}{4\pi N_{\text{total}}} \quad (\text{S9})$$

where  $A_{\text{total}}$  denotes the total surface area measured and  $N_{\text{total}}$  denotes the total number of particles producing that surface area.

## **$\text{HO}_2$ reactivity of ambient gas phase ( $k_g$ )**

Gas phase  $\text{HO}_2$  reactivity was directly measured in the reaction cell without aerosol phase. To check the dominant factor of the gas phase  $\text{HO}_2$  reactivity, we modeled the  $\text{HO}_2$  reactivity by using the  $\text{NO}_2$  concentration in the LFP reaction cell, using the calibration factor obtained by plotting the measured  $\text{HO}_2$  decay rates as a function of the  $\text{NO}_2$  concentration prepared in the laboratory (with the  $\text{NO}_2$  concentration in zero air ranging from 0 to 85 ppb at 298 K and 1 atm in the reaction cell, Fig. S4).

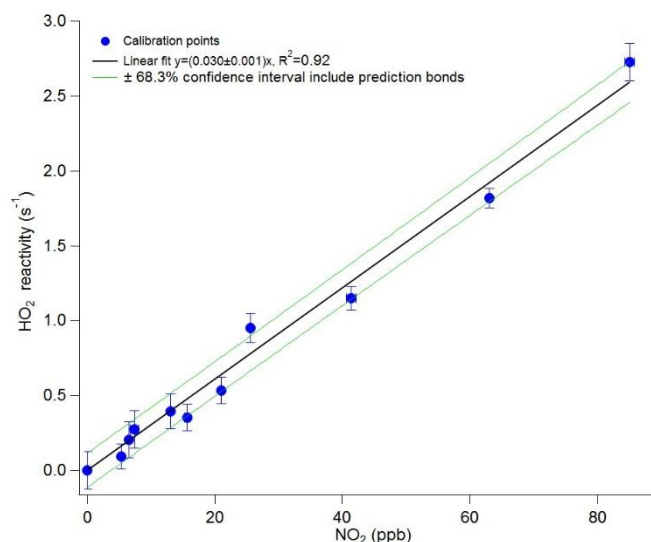

281

282 Figure S4: Average of HO<sub>2</sub> reactivity calibrations using LFP-LIF with different NO<sub>2</sub> concentrations  
 283 supplied by NO<sub>2</sub> gas. The green lines represent the  $\pm 68.3\%$  prediction band of the calibration data points  
 284 ( $1\sigma = 0.1 \text{ s}^{-1}$ ), i.e., the uncertainty in the estimation of HO<sub>2</sub> reactivity using the calibration curve.

285 The linear fitting coefficient represents the HO<sub>2</sub> reactivity with NO<sub>2</sub> concentrations in the reaction cell,  
 286 which was  $0.030 \text{ s}^{-1} \text{ ppb}^{-1}$  with a standard deviation of 0.001. This indicates that the instrument accuracy  
 287 in determining  $k_{\text{HO}_2}$  from NO<sub>2</sub> concentration was 3%. This calibration factor was used to simulate HO<sub>2</sub>  
 288 reactivity ( $k_{\text{HO}_2}$ ) caused by NO<sub>2</sub> from ambient air in the LIF reaction cell as follows:

289 
$$k_{\text{HO}_2}(\text{s}^{-1}) = (0.030 \text{ (s}^{-1}/\text{ppb)} \times \Delta\text{NO}_2(\text{ppb})) \times \left( \frac{k_f([M], T)}{k_c([M], T)} \right) \quad (\text{S10})$$

290 where  $\Delta\text{NO}_2$  denotes the difference between the NO<sub>2</sub> concentrations in ambient air and zero gas (here  
 291 NO<sub>2</sub> is  $\sim 0.5 \text{ ppb}$  in zero gas, which may be due to the interferences in zero gas), while  $k_f([M], T)$  and  
 292  $k_c([M], T)$  denote the rate constant calculated from the equations recommended by Sander et al. (2011)<sup>8</sup>  
 293 using the temperature in the reaction cell at the ambient air measurement time and calibration time,  
 294 respectively.

## 295 Temperature and pressure influence correction

296 Reaction in SR6 is favored by low-temperature and high-pressure conditions and is believed to play an  
 297 important role in the free troposphere and particularly the upper troposphere as it becomes cooler with  
 298 higher pressure<sup>9</sup>. The room temperature was maintained at 298 K during the whole campaign. However,  
 299 the temperature in the reaction cell ranged from 298 K to 302 K due to the sampled ambient air

temperature. The temperature and pressure correction was done according to the procedure adopted by the National Aeronautics and Space Administration (NASA) data evaluation panel, as follows<sup>8</sup>:

$$k_f([M], T) = \left[ \frac{k_0(T)[M]}{1 + \frac{k_0(T)[M]}{k_\infty(T)}} \right] 0.6 \left\{ 1 + \left[ \log_{10} \left( \frac{k_0(T)[M]}{k_\infty(T)} \right) \right]^2 \right\}^{-1} \quad (\text{S11})$$

where  $k_0(T)$  denotes the low-pressure-limiting rate constants, which can be calculated as:

$$k_0(T) = k_0^{300} \left( \frac{T}{300} \right)^{-n} \text{ cm}^6 \text{ molecule}^{-2} \text{ s}^{-1} \quad (\text{S12})$$

and  $k_\infty(T)$  denotes the limiting high-pressure rate constant, which can be calculated similarly:

$$k_\infty(T) = k_\infty^{300} \left( \frac{T}{300} \right)^{-m} \text{ cm}^3 \text{ molecule}^{-1} \text{ s}^{-1} \quad (\text{S13})$$

Here,  $n$  and  $m$  in Eqs. S11&S12 represent the temperature-dependent coefficients, which are recommended as  $0.34 \pm 0.4$  and  $1.1 \pm 1.4$ , respectively. The equilibrium constants at temperature  $T$ ,  $K(T)$ , can be expressed as:

$$K(T) = \frac{k_f([M], T)}{k_{-1}(T)} = 2.1 \times 10^{-27} \left( \frac{10900}{T} \right) \text{ cm}^3 \text{ molecule}^{-1} \text{ s}^{-1} \quad (\text{S14})$$

Thus,  $k_{-1}(T)$ , which is the rate constant of the reverse reaction of SR6, can be calculated from the known  $K(T)$  and  $k_f([M], T)$ .

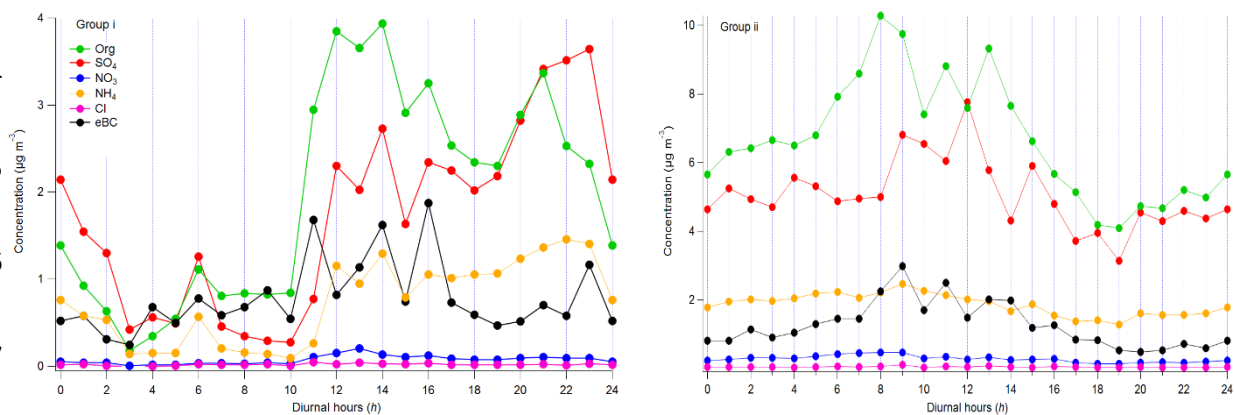

Figure S5: Diurnal trends in non-refractory chemical components plus eBC of group i (left side) and group ii (right side).

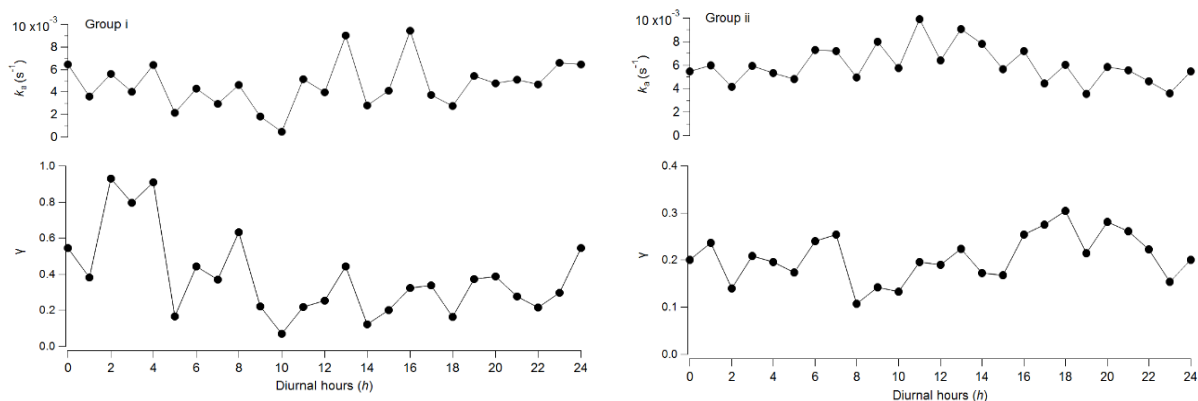

Figure S6: Diurnal trends in total  $\text{HO}_2$  reactivity caused by the ambient aerosol phase ( $k_a$ , upper panel) and the  $\text{HO}_2$  uptake coefficients onto ambient aerosols ( $\gamma$ , lower panel).

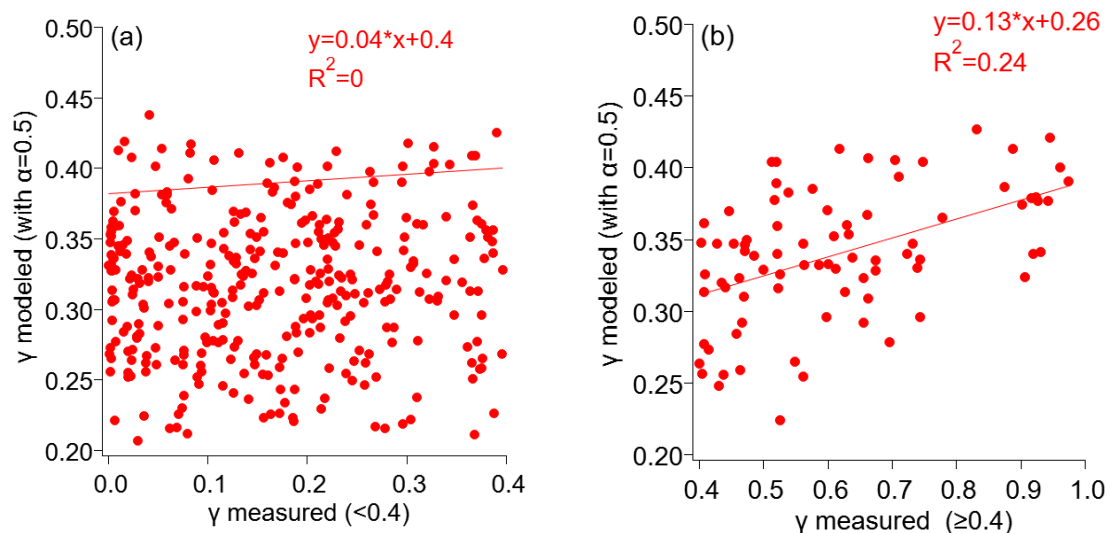

Figure S7: Correlations between measured and modeled  $\gamma$  with (a)  $\gamma < 0.4$  and (b)  $\gamma \geq 0.4$ .



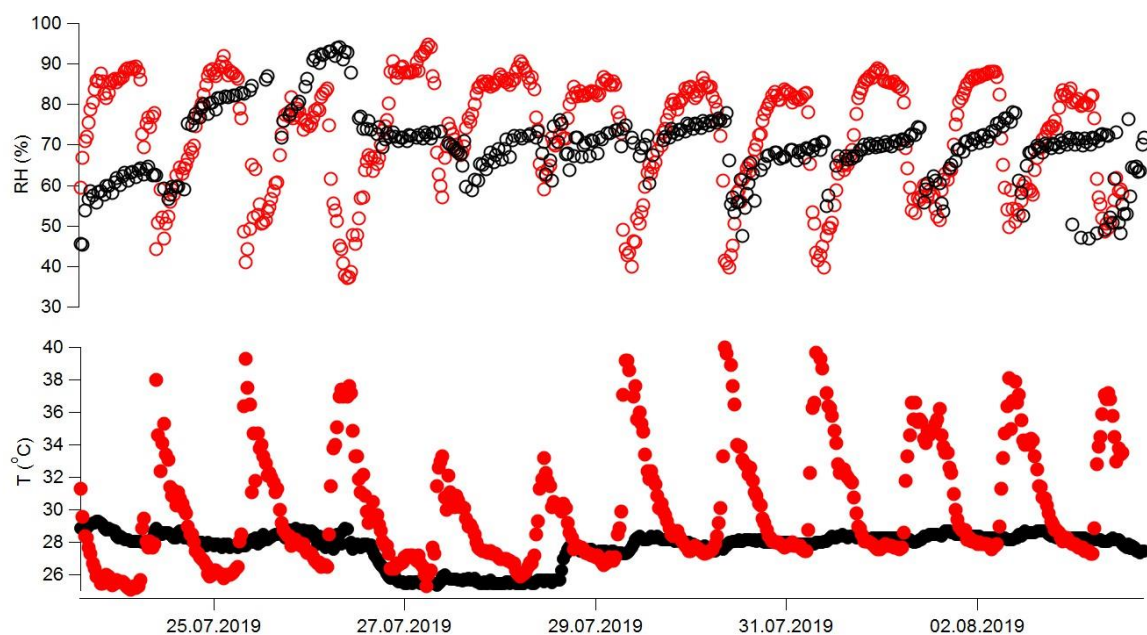

Figure S8: Time series of the half-hour averaged ambient RH (red open cycles in the upper panel) and temperature (red filled cycles in the lower panel) measurements in comparison to the reaction cell RH (black open cycles in the upper panel) and temperature (black filled cycles in the lower panel).

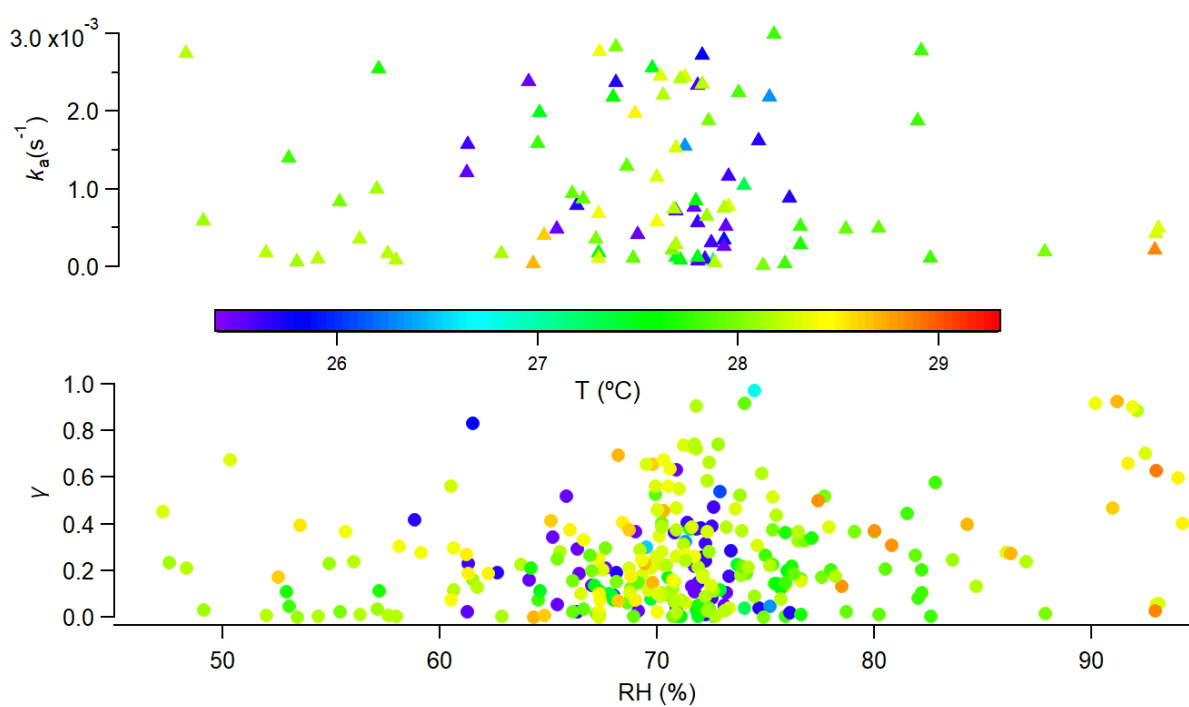

Figure S9:  $k_a$  and  $\gamma$  values as a function of RH in the reaction cell, colored coded with  $T$ .

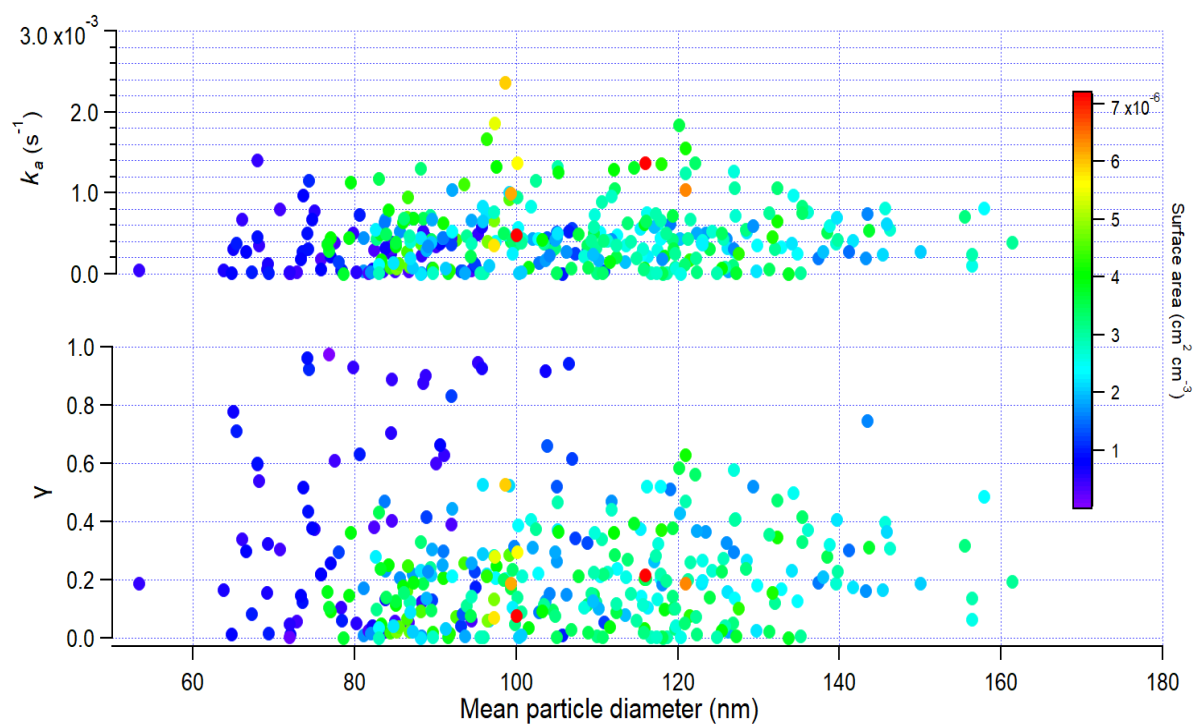

Figure S10:  $k_a$  (upper panel) and  $\gamma$  (lower panel) as a function of mean particle diameter, color coded with the surface area concentration.

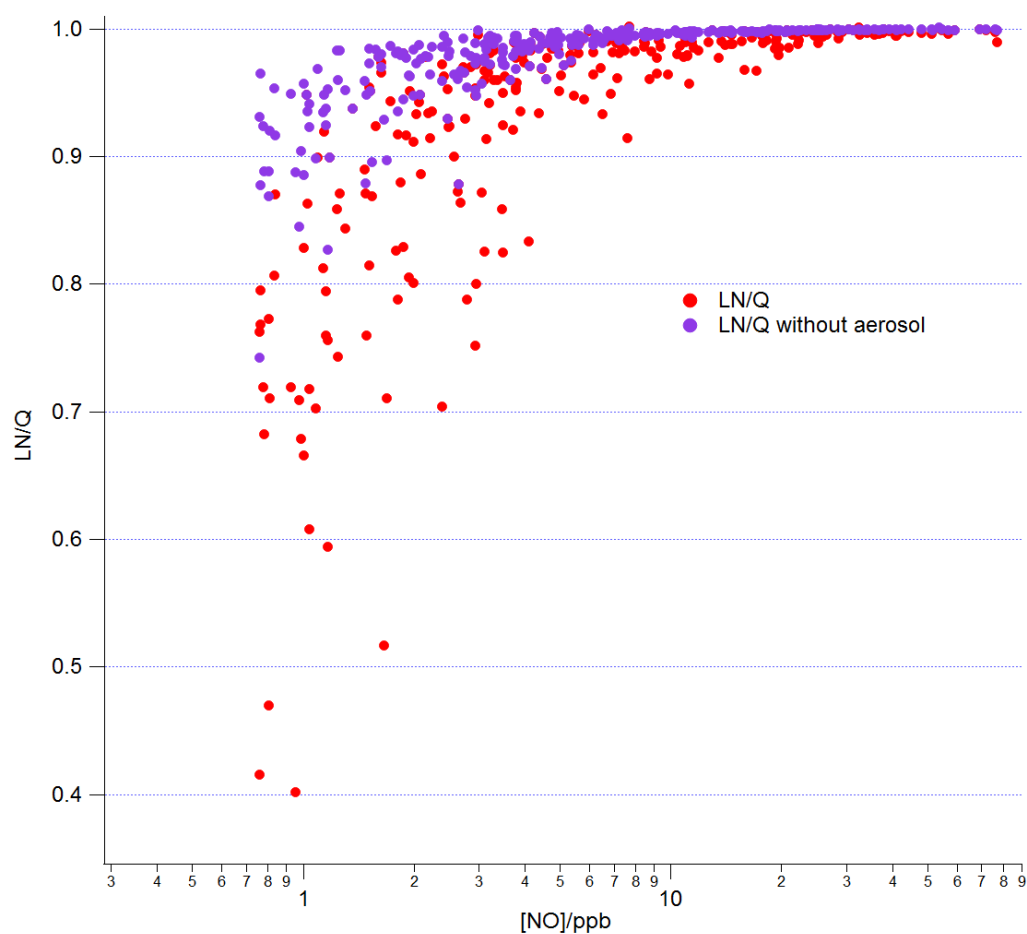

Figure S11: Dependence of day time  $LN/Q$  and  $LN/Q_{\text{without\_aerosol}}$  on  $[NO]$ .

### Profiles of key factors used in Section 3.5:

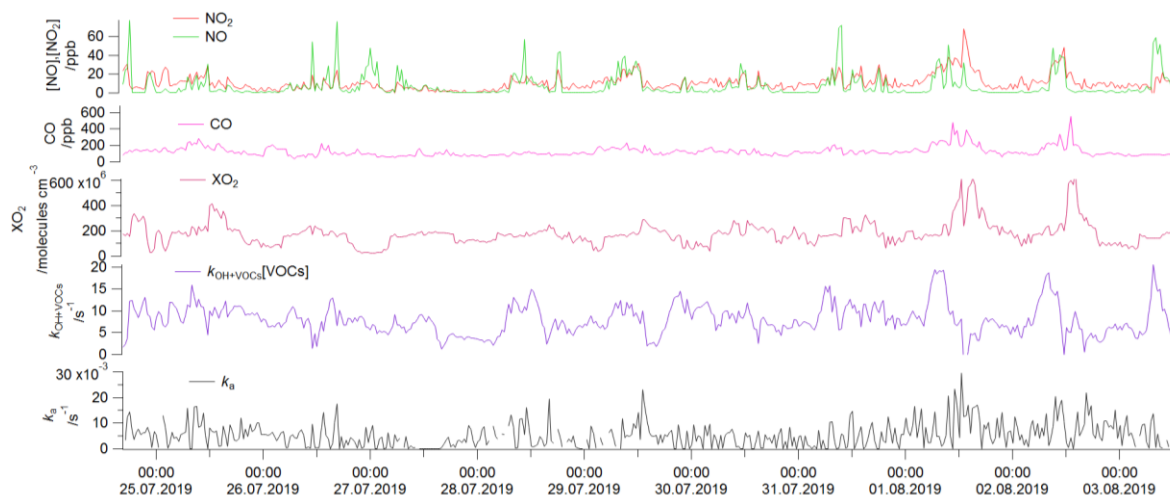

Figure S12: Temporal variations in key factors in ambient air for determining  $XO_2$  loss rates and  $P(O_3)$  sensitivity in Sect. 3.6.

363  
364  
365  
366  
367  
368  
369  
370  
371  
372  
373  
374  
375  
376  
377  
378  
379  
380

**Table S1** Summary of equations and values used in Section 3.4.

| Parameters                                                                    | Equations and values                                                        | Ref.                 |
|-------------------------------------------------------------------------------|-----------------------------------------------------------------------------|----------------------|
| $\omega / \text{cm s}^{-1}$                                                   | 47376                                                                       |                      |
| $\alpha^{\text{HO}_2*}$                                                       | >0.2 (with copper (II)-doped aerosols)                                      | [ <sup>10-16</sup> ] |
| $H_{eff} / \text{M atm}^{-1}$                                                 | $H_{\text{HO}_2} (1 + \frac{k_{eq}}{[H^+]})$                                | [ <sup>17</sup> ]    |
| $H_{\text{HO}_2} / \text{M atm}^{-1}$                                         | EXP(4.9×4184/(8.314×T))                                                     | [ <sup>18</sup> ]    |
| $k_{eq}^{**}$                                                                 | $2.1 \times 10^{-5}$                                                        | [ <sup>17</sup> ]    |
| $[H^+] / \text{mol L}^{-1}$                                                   | $10^{-\text{pH}}$                                                           |                      |
| pH                                                                            | Calculated from the ISORROPIA-II model                                      |                      |
| $R / \text{J mol}^{-1} \text{K}^{-1}$                                         | 8.314                                                                       |                      |
| $[\text{HO}_2(\text{g})]^{** *}$                                              | $1.0 \times 10^{10}$                                                        | [ <sup>3</sup> ]     |
| $r_p / \text{cm}$                                                             | Measured by SMPS                                                            |                      |
| $k_{\text{TMI}}^{\text{II}} / \text{M}^{-1} \text{s}^{-1}$                    | $10^9$                                                                      | [ <sup>17</sup> ]    |
| $[\text{TMI}] / \text{mol L}^{-1}$ (using $\text{Cu}^{2+}$ as surrogate) **** | $0.1 \times [\text{Cu}]^{***}$<br><i>Liquid content in the aerosol ****</i> | [ <sup>19</sup> ]    |
| $D_{aq}$                                                                      | $10^{-5}$                                                                   | [ <sup>17</sup> ]    |

\* Due to the aerosol particles collected in Yokohama City containing Cu, a high accommodation coefficient of HO<sub>2</sub> ( $\alpha^{\text{HO}_2}$ ) may lead to HO<sub>2</sub> uptake as an important sink of the HOx radical. According to the current research studies, we select  $\alpha^{\text{HO}_2}$  as 0.2 (typically for organics) and 0.5 (typically for inorganics) for the model simulation.

\*\* HO<sub>2</sub> acid dissociation constant

\*\*\*HO<sub>2</sub> concentration in the reaction cell, calculated using the same method as Zhou et al. (2019)<sup>3</sup>.

\*\*\*\* Measured by off-line method

381 **Table S2** Summary of equations and values used in Section 3.6.

| Parameters                                                                                                                                 | Equations and values                                                                                                                                                          | Ref.              |
|--------------------------------------------------------------------------------------------------------------------------------------------|-------------------------------------------------------------------------------------------------------------------------------------------------------------------------------|-------------------|
| $k_a=k_{\text{HO}_2}=k_{\text{RO}_2}$                                                                                                      | Observed                                                                                                                                                                      |                   |
| $k_{\text{NO}-\text{XO}_2}=k_{\text{NO}-\text{HO}_2}=k_{\text{NO}-\text{RO}_2}$<br>/cm <sup>3</sup> molecule <sup>-1</sup> s <sup>-1</sup> | $3.3 \times 10^{12} \exp\left(\frac{270}{T}\right)$                                                                                                                           | [ <sup>20</sup> ] |
| [OH]<br>/molecules cm <sup>-3</sup>                                                                                                        | 10 <sup>6</sup> (we assumed it is constant during the campaign)                                                                                                               |                   |
| [HO <sub>2</sub> ]* /molecules cm <sup>-3</sup>                                                                                            | Day time (4:30 am – 7 pm):<br>$\exp(8.4171 \times 10^{-13} [\text{O}_3] + 18.081)$<br>Night-time (7 pm – 4:30 am):<br>$6.042 \times 10^6 + 1.841 \times 10^{-4} [\text{O}_3]$ | [ <sup>21</sup> ] |
| [XO <sub>2</sub> ]/molecules cm <sup>-3</sup>                                                                                              | [HO <sub>2</sub> ] plus [RO <sub>2</sub> ]                                                                                                                                    |                   |
| [HCHO]**/ppb                                                                                                                               | 2                                                                                                                                                                             |                   |
| $k_{\text{OH}-\text{VOCs}}[\text{VOCs}]/\text{s}^{-1}$                                                                                     | Total OH reactivity ( $k_{\text{OH}}^*$ ) minus $k_{\text{OH}+\text{NO}_2}[\text{NO}_2]$                                                                                      |                   |
| $k_{\text{HO}_2-\text{HO}_2}$<br>/cm <sup>3</sup> molecule <sup>-1</sup> s <sup>-1</sup>                                                   | $1.5 \times 10^{-12}$                                                                                                                                                         | [ <sup>22</sup> ] |
| $k_{\text{HO}_2-\text{RO}_2}$<br>/cm <sup>3</sup> molecule <sup>-1</sup> s <sup>-1</sup>                                                   | $2.91 \times 10^{-13} \exp\left(\frac{1300}{T}\right) [1 - \exp(-0.245n)]$<br>(n = 4, assumed from observed VOCs distribution).                                               | [ <sup>23</sup> ] |
| $k_{\text{OH}-\text{HCHO}}$<br>/cm <sup>3</sup> molecule <sup>-1</sup> s <sup>-1</sup>                                                     | $8.2 \times 10^{-12} \times (T/298) \exp(0.33/(8.314 \times T))$                                                                                                              | [ <sup>8</sup> ]  |
| $k_{\text{OH}-\text{CO}}$<br>/cm <sup>3</sup> molecule <sup>-1</sup> s <sup>-1</sup>                                                       | $2.4 \times 10^{-13}$                                                                                                                                                         | [ <sup>20</sup> ] |
| $k_{\text{OH}-\text{NO}_2}$<br>/cm <sup>3</sup> molecule <sup>-1</sup> s <sup>-1</sup>                                                     | $1.21 \times 10^{-11}$                                                                                                                                                        | [ <sup>24</sup> ] |

382 \*Measured in real time

383 \*\*Average value measured during the campaign

384

385

386

387

388

389

390

391

392

- 394 1. Sadanaga, Y.; Yoshino, A.; Watanabe, K.; Yoshioka, A.; Wakazono, Y.; Kanaya, Y.; Kajii, Y.,  
395 Development of a measurement system of OH reactivity in the atmosphere by using a laser-induced  
396 pump and probe technique. *Review of Scientific Instruments* **2004**, *75*, (8), 2648-2655.
- 397 2. Miyazaki, K.; Nakashima, Y.; Schoemaeker, C.; Fittschen, C.; Kajii, Y., Note: A laser-flash  
398 photolysis and laser-induced fluorescence detection technique for measuring total HO<sub>2</sub> reactivity in  
399 ambient air. *Review of Scientific Instruments* **2013**, *84*, (7), 076106.
- 400 3. Zhou, J.; Murano, K.; Kohno, N.; Sakamoto, Y.; Kajii, Y., Real-time quantification of the total  
401 HO<sub>2</sub> reactivity of ambient air and HO<sub>2</sub> uptake kinetics onto ambient aerosols in Kyoto (Japan).  
402 *Atmospheric Environment* **2019**, 117189.
- 403 4. Sakamoto, Y.; Zhou, J.; Kohno, N.; Nakagawa, M.; Hirokawa, J.; Kajii, Y., Kinetics Study of OH  
404 Uptake onto Deliquesced NaCl Particles by Combining Laser Photolysis and Laser-Induced  
405 Fluorescence. *The Journal of Physical Chemistry Letters* **2018**, *9*, (14), 4115-4119.
- 406 5. Sioutas, C.; Kim, S.; Chang, M., Development and evaluation of a prototype ultrafine particle  
407 concentrator. *Journal of Aerosol Science* **1999**, *30*, (8), 1001-1017.
- 408 6. Matthews, P. S. J.; Baeza-Romero, M. T.; Whalley, L. K.; Heard, D. E., Uptake of HO<sub>2</sub>  
409 radicals onto Arizona test dust particles using an aerosol flow tube. *Atmos. Chem. Phys.* **2014**, *14*, (14),  
410 7397-7408.
- 411 7. Brown, R. L., *Tubular flow reactors with first-order kinetics*. 1978; Vol. 83.
- 412 8. Sander, S. P., J. Abbatt, J. R. Barker, J. B. Burkholder, R. R. Friedl, D. M. Golden, R. E. Huie, C. E.  
413 Kolb, M. J. Kurylo, G.; K. Moortgat, V. L. O. a. P. H. W., Chemical Kinetics and Photochemical Data for  
414 Use in Atmospheric Studies, Evaluation No. 17. *Jet Propulsion Laboratory publication* **2011**, *JPL*  
415 *Publication 10-6*, (Jet Propulsion Laboratory, Pasadena, 2011 <http://jpldataeval.jpl.nasa.gov>).
- 416 9. Chen, G.; Davis, D.; Crawford, J.; Hutterli, L. M.; Huey, L. G.; Slusher, D.; Mauldin, L.; Eisele, F.;  
417 Tanner, D.; Dibb, J.; Buhr, M.; McConnell, J.; Lefer, B.; Shetter, R.; Blake, D.; Song, C. H.; Lombardi, K.;  
418 Arnoldy, J., A reassessment of HO<sub>x</sub> South Pole chemistry based on observations recorded during ISCAT  
419 2000. *Atmospheric Environment* **2004**, *38*, (32), 5451-5461.
- 420 10. Lakey, P. S. J.; George, I. J.; Baeza-Romero, M. T.; Whalley, L. K.; Heard, D. E., Organics  
421 Substantially Reduce HO<sub>2</sub> Uptake onto Aerosols Containing Transition Metal ions. *The Journal of*  
422 *Physical Chemistry A* **2016**, *120*, (9), 1421-1430.
- 423 11. Lakey, P. S. J.; Berkemeier, T.; Krapf, M.; Dommen, J.; Steimer, S. S.; Whalley, L. K.; Ingham, T.;  
424 Baeza-Romero, M. T.; Pöschl, U.; Shiraiwa, M.; Ammann, M.; Heard, D. E., The effect of viscosity and  
425 diffusion on the HO<sub>2</sub> uptake by sucrose and secondary organic aerosol particles. *Atmos. Chem. Phys.*  
426 **2016**, *16*, (20), 13035-13047.
- 427 12. Taketani, F.; Kanaya, Y.; Akimoto, H., Kinetics of Heterogeneous Reactions of HO<sub>2</sub> Radical at  
428 Ambient Concentration Levels with (NH<sub>4</sub>)<sub>2</sub>SO<sub>4</sub> and NaCl Aerosol Particles. *The Journal of Physical*  
429 *Chemistry A* **2008**, *112*, (11), 2370-2377.
- 430 13. Thornton, J.; Abbatt, J. P. D., Measurements of HO<sub>2</sub> uptake to aqueous aerosol: Mass  
431 accommodation coefficients and net reactive loss. **2005**, *110*, (D8).
- 432 14. George, I. J.; Matthews, P. S. J.; Whalley, L. K.; Brooks, B.; Goddard, A.; Baeza-Romero, M. T.;  
433 Heard, D. E., Measurements of uptake coefficients for heterogeneous loss of HO<sub>2</sub> onto submicron  
434 inorganic salt aerosols. *Physical Chemistry Chemical Physics* **2013**, *15*, (31), 12829-12845.
- 435 15. Taketani, F.; Kanaya, Y.; Akimoto, H., Heterogeneous loss of HO<sub>2</sub> by KCl, synthetic sea salt, and  
436 natural seawater aerosol particles. *Atmospheric Environment* **2009**, *43*, (9), 1660-1665.
- 437 16. Mozurkewich, M.; McMurry, P. H.; Gupta, A.; Calvert, J. G., Mass accommodation coefficient  
438 for HO<sub>2</sub> radicals on aqueous particles. **1987**, *92*, (D4), 4163-4170.
- 439 17. Thornton, J. A.; Jaeglé, L.; McNeill, V. F., Assessing known pathways for HO<sub>2</sub> loss in aqueous  
440 atmospheric aerosols: Regional and global impacts on tropospheric oxidants. *Journal of Geophysical*  
441 *Research: Atmospheres* **2008**, *113*, (D5).

18. Hanson, D. R.; Burkholder, J. B.; Howard, C. J.; Ravishankara, A. R., Measurement of hydroxyl and hydroperoxy radical uptake coefficients on water and sulfuric acid surfaces. *The Journal of Physical Chemistry* **1992**, *96*, (12), 4979-4985.
19. Ross, H. B.; Noone, K. J., A numerical investigation of the destruction of peroxy radical by Cu ion catalysed reactions on atmospheric particles. *Journal of Atmospheric Chemistry* **1991**, *12*, (2), 121-136.
20. Burkholder, J. B. S., S. P.; Abbatt, J.; Barker, J. R.; Huie, R. E.; Kolb, C. E.; Kurylo, 205 M. J.; Orkin, V. L.; Wilmouth, D. M.; Wine, P. H., Chemical Kinetics and photochemical Data for Use in Atmospheric Studies. *Evaluation No. 18. Jet Propulsion Laboratory: Pasadena, USA* **2015**, <https://jpldataeval.jpl.nasa.gov/>.
21. Kanaya, Y.; Cao, R.; Akimoto, H.; Fukuda, M.; Komazaki, Y.; Yokouchi, Y.; Koike, M.; Tanimoto, H.; Takegawa, N.; Kondo, Y., Urban photochemistry in central Tokyo: 1. Observed and modeled OH and HO<sub>2</sub> radical concentrations during the winter and summer of 2004. *Journal of Geophysical Research: Atmospheres* **2007**, *112*, (D21).
22. Kanno, N.; Tonokura, K.; Tezaki, A.; Koshi, M., Nitrogen- and water-broadening coefficient measurements in the  $\tilde{A}^1\tilde{2}A' \leftarrow \tilde{X}^1\tilde{2}A''$  000 – 000 band of HO<sub>2</sub> using high-resolution diode laser two-tone frequency modulation spectroscopy. *Journal of Molecular Spectroscopy* **2005**, *229*, (2), 193-197.
23. Saunders, S. M.; Jenkin, M. E.; Derwent, R. G.; Pilling, M. J., Protocol for the development of the Master Chemical Mechanism, MCM v3 (Part A): tropospheric degradation of non-aromatic volatile organic compounds. *Atmospheric Chemistry and Physics* **2003**, *3*, (1), 161-180.
24. Sadanaga, Y.; Kondo, S.; Hashimoto, K.; Kajii, Y., Measurement of the rate coefficient for the OH+NO<sub>2</sub> reaction under the atmospheric pressure: Its humidity dependence. *Chemical Physics Letters* **2006**, *419*, (4), 474-478.
